# Supplementary material for: Satisfaction of patients and healthcare practitioners with the services provided by urgent care centers in Saudi Arabia, 2024: a cross-sectional study
Source: Research Square preprint supplement (doi:10.21203/rs.3.rs-7157868/v1), 2025-08-22
Supplement: Supplementary file 1 [file c446fce609a3d38cf5404ff9.docx]

# Survey to Measure the Satisfaction of Visitors to Urgent Care Centers in Saudi Arabia, 2024

Dear Participant,

The Health Cluster is always keen to improve the quality of healthcare services provided to patients by involving them in the development process, as they are the most important part of the healthcare system.

Urgent Care Services have been introduced to serve patients who do not require emergency department visits or prior appointments.

This survey aims to evaluate the satisfaction level of beneficiaries of urgent care services in Saudi Arabia in 2024.

Participation in this survey is optional; you have the right to withdraw at any time, and no personal data will be collected. All information provided will be used for research purposes only.

For any inquiries, please feel free to contact the research supervisor:

Dr. Mai Alharbi
Email: Dr.mai.alharbi@gmail.com
Phone: 0558404741

## Consent to Participate

Do you agree to participate in this study and allow your data to be used for research purposes?

- Yes
- No

## Section 1: Visit Information

1. How many times have you visited an urgent care center (walk-in services without appointment) before this visit?
- This is my first time
- 1–2 times
- 3–5 times
- More than 5 times

2. What are your reasons for choosing urgent care instead of the emergency department? (Select all that apply)
- Easy access (close to residence)
- Service available at all times
- No need to book an appointment
- Shorter waiting time
- More comfortable environment than the emergency department
- Required services are available (consultation, lab, x-ray, pharmacy)
- Better communication with physician
- My medical condition is simple and does not require ER visit

## Section 2: Demographic and Social Data

1. Age
- 18–25
- 26–45
- 46–65
- ≥ 66

2. Gender
- Male
- Female

3. Nationality
- Saudi
- Non-Saudi Resident
- Non-Saudi Visitor

4. Marital Status
- Married
- Single
- Divorced/Widowed

5. Educational Level
- Can only read and write
- General education
- University/Diploma
- Postgraduate

6. Employment Status
- Studying (general or university level)
- Employed
- Neither studying nor working

## Section 3: Satisfaction with Urgent Care Services

Please indicate your level of agreement with the following statements:

| Statement | Strongly Agree | Agree | Not Sure | Disagree | Strongly Disagree |
| --- | --- | --- | --- | --- | --- |
| 1. I accessed the urgent care center easily |  |  |  |  |  |
| 2. Registration and reception procedures were quick and easy |  |  |  |  |  |
| 3. The waiting area was comfortable and had enough seating |  |  |  |  |  |
| 4. The waiting time to see the medical team was short |  |  |  |  |  |
| 5. I felt annoyed due to long waiting in some sections |  |  |  |  |  |
| 6. The medical team treated me kindly and respectfully |  |  |  |  |  |
| 7. I felt the medical team was too busy to attend to me |  |  |  |  |  |
| 8.The medical team overlooked important information I shared about my medical condition. |  |  |  |  |  |
| 9. The medical team understood my urgent condition |  |  |  |  |  |
| 10. My vital signs were taken and I was examined carefully |  |  |  |  |  |
| 11. The physician explained the treatment plan clearly |  |  |  |  |  |
| 12. I felt comfortable with the care I received |  |  |  |  |  |
| 13. The center lacks supportive medical services (labs, x-rays) |  |  |  |  |  |
| 14. I got my medication easily |  |  |  |  |  |
| 15. I am fully satisfied with the urgent care services provided |  |  |  |  |  |
| 16. I didn’t feel better and needed urgent ER follow-up |  |  |  |  |  |
| 17. The center saved me time and effort |  |  |  |  |  |
| 18. Urgent care service met my expectations |  |  |  |  |  |
| 19. I have doubts about the doctor’s ability to treat me |  |  |  |  |  |
| 20. I still believe ER services are easier and faster |  |  |  |  |  |

End of Survey
Thank you for participating.
